# Supplementary material
Source: publisher site journal article supplement (https://www.dovepress.com/article/581070)
Supplement: Supplementary file 1 [file Supplementary%20materials.docx]

**Supplementary materials content**

**Figure S1** Flow chart of the study.

**Table S1.** Comparison of basic variables after randomly assigned between training and internal validation cohorts.

**
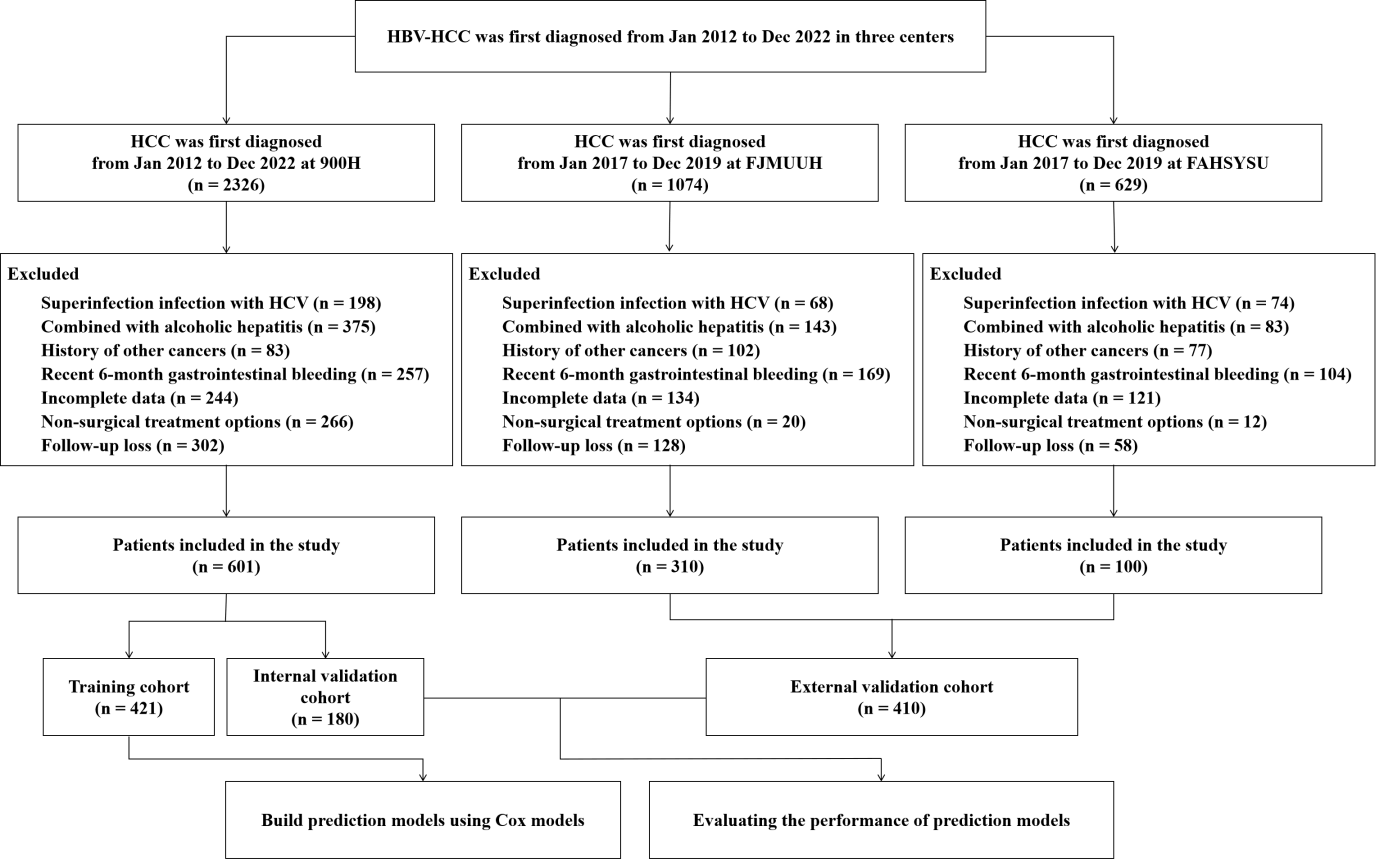
**

**Figure S1.** Flow chart of the study.

**Abbreviations:** RAR, red cell distribution width-to-albumin ratio; 900H, 900th Hospital of PLA Joint Logistics Support Force; FJMUUH, Fujian Medical University Union Hospital; FAHSYSU, The First Affiliated Hospital of Sun Yat-sen University.

**Table S1.** Comparison of basic variables after randomly assigned between training and internal validation cohorts

| Characteristic | Training Cohort  （N = 421） | Internal Test Cohort  （N = 180） | *p*-value |
| --- | --- | --- | --- |
| Age, years | 54.5 ± 0.60 | 54.6 ± 0.8 | 0.536 |
| Gender |  |  | 0.483 |
| Male | 363 (86%) | 159 (88%) |  |
| Female | 58 (14%) | 21 (12%) |  |
| Hypertension |  |  | 0.650 |
| No | 366 (87%) | 154 (86%) |  |
| Yes | 55 (13%) | 26 (14%) |  |
| Diabetes |  |  | 0.467 |
| No | 383 (91%) | 167 (93%) |  |
| Yes | 38 (9%) | 13 (7%) |  |
| LYM, ×109/L | 1.54 [1.22, 1.94] | 1.50 [1.13, 2.06] | 0.939 |
| RBC, ×1012/L | 4.56 [4.13, 4.97] | 4.53 [4.18, 4.95] | 0.754 |
| RDW, % | 13.60 [12.90, 14.30] | 13.60 [12.90, 14.33] | 0.754 |
| RAR, %/g/L | 0.33 [0.30, 0.38] | 0.33 [0.30, 0.37] | 0.603 |
| MCV, fL | 92 [87, 96] | 93 [88, 95] | 0.191 |
| PLT, ×109/L | 181 [129, 230] | 182 [142, 235] | 0.468 |
| TBIL, μmol/L | 15 [10, 20] | 13 [10, 19] | 0.623 |
| ALB, g/L | 41.4 [38.0, 44.5] | 41.0 [38.0, 44.2] | 0.394 |
| Tumor size, cm | 6.9 [3.8, 10.5] | 7.4 [4.0, 11.2] | 0.222 |
| AFP, ng/mL |  |  | 0.554 |
| Negative | 244 (58%) | 99 (56%) |  |
| Positive | 175 (42%) | 79 (44%) |  |
| HBV DNA |  |  | 0.100 |
| Negative | 166 (41%) | 59 (34%) |  |
| Positive | 237 (59%) | 115 (66%) |  |
| HBeAg |  |  | 0.118 |
| Negative | 304 (81%) | 119 (75%) |  |
| Positive | 72 (19%) | 40 (25%) |  |
| Tumor number |  |  | 0.505 |
| single | 223 (53%) | 90 (50%) |  |
| multiple | 198 (47%) | 90 (50%) |  |
| Splenomegaly |  |  | 0.940 |
| No | 277 (66%) | 119 (66%) |  |
| Yes | 144 (34%) | 61 (34%) |  |
| Cirrhosis |  |  | 0.579 |
| No | 155 (37%) | 62 (34%) |  |
| Yes | 266 (63%) | 118 (66%) |  |
| PVTT |  |  | 0.124 |
| No | 309 (73%) | 121 (67%) |  |
| Yes | 112 (27%) | 59 (33%) |  |
| TNM |  |  | 0.813 |
| I | 124 (29%) | 47 (26%) |  |
| II | 90 (21%) | 38 (21%) |  |
| III | 150 (36%) | 67 (37%) |  |
| IV | 57 (14%) | 28 (16%) |  |

**Abbreviations:** WBC, white blood cell; NEU, neutrophil; LYM, lymphocyte; RBC, red blood cell; RDW, red blood cell distribution width; HCT, hematocrit; MCV, mean corpuscular volume; PLT, platelet; TBIL, total bilirubin; RAR, red blood cell distribution width to albumin ratio; AFP, alpha fetoprotein; PVTT, portal vein tumor thrombus
